# Feedback ratiometric control of two microbial populations in a single chemostat

Davide Fiore<sup>1,\*</sup>, Fabio Della Rossa<sup>2,\*</sup>, Agostino Guarino<sup>3</sup>, Mario di Bernardo<sup>4</sup>

**Abstract**—We analyze the problem of controlling the dilution rate in a chemostat to regulate the ratio between the concentrations of two microbial populations growing in continuous culture. After analyzing the open-loop dynamics of this multicellular system, we present two alternative feedback control strategies, one based on a gain-scheduled state feedback controller, the other on a switching control strategy. We show that both strategies are effective in solving the problem and illustrate the results by a set of representative numerical simulation.

## I. INTRODUCTION

Synthetic Biology aims at engineering biological systems with new functionalities, with applications ranging from health treatments to bioremediation, to production of biofuels and drugs in bioreactors. This is made possible by embedding into living cells, such as bacteria and fungi, artificial genetic circuits modifying the natural behavior of these biological systems. That is, they change at what condition and rate genes are expressed in the cells to produce proteins or chemicals. However, the complexity and hence the capabilities of these engineered genetic circuits are limited by inherent factors in their host cells, such as excessive metabolic burden, competition of limited resources and incompatible chemical reactions. To overcome these limitations a promising strategy is to distribute the required functionalities among several cell populations forming a microbial consortium, so that each cell strain embeds a smaller subset of engineered genes [1]–[3]. In this way each cell carries out a specialized role and, by dividing the labor, contributes more efficiently to the achievement of the final goal. Unfortunately, this solution comes with an additional challenge; due to unavoidable differences in their genetic loads, all cell populations in the consortium will grow at different rates, and can give rise to undesired dynamics, such as oscillations, or even extinction [4]. Therefore, for the correct operation of the designed consortium it is essential to guarantee stable coexistence between the constituent populations by regulating their relative numbers. In the absence of mechanisms designed *ad hoc*

into the cells allowing them to self-balance their ratio, it is necessary to regulate the populations’ densities by means of some external action [5]. Moreover, in industrial applications where high production efficiency is required, external control strategies should be preferred to embedded solutions, because additional genetic circuits can cause further metabolic burden to the cells and hence lower production rates of the desired metabolic end products.

In this letter we consider the problem of regulating the relative numbers, i.e., the *ratio*, of two independent cellular species in a chemostat, while, at the same time, guaranteeing their survival. Previous work presented in the literature considered apparently similar scenarios involving two cellular populations in a chemostat, although, to the best of our knowledge, the specific problem presented above was never been studied. Specifically, in [6] the authors showed that two species can be made to coexist in a chemostat by means of state-feedback control of the dilution rate, with the resulting closed-loop system having an equilibrium point in the positive orthant to which all solutions converge, without specifying any other designing requirement on the state. Moreover, the problem of guaranteeing survival of a resident species with respect the invasion of a new species was also considered in [7].

After presenting a complete description of the rich nonlinear dynamics of the system, we propose and analyze two control algorithms that, by acting only on the dilution rate, can regulate the ratio between the concentrations of the two species grown in continuous culture in the same chemostat to a given desired value, say  $r_d$ . The first control algorithm we present is a gain-scheduled state-feedback controller guaranteeing global convergence to the desired set-point. The second control algorithm is a switching controller changing the dilution rate between two values to guarantee convergence of all solutions towards the desired set-point located on the sliding region. We analyze the closed-loop dynamics for both controllers and compare their robustness to parameter perturbations. We conclude by discussing the advantages and limitations of the proposed control strategies and by outlining a promising experimental implementation that can overcome these limitations and enhance the control performance.

## II. MATHEMATICAL MODELS AND DYNAMICS

We consider two microbial populations growing in continuous culture in a chemostat [8]. The two species are assumed to feed on the same substrate and to be independent, that is, they do not directly influence their respective growth rate.

\* These authors contributed equally

<sup>1</sup>Davide Fiore is with the Department of Mathematics and Applications “R. Caccioppoli”, University of Naples Federico II, Via Cinzia, Monte S. Angelo, 80126 Naples, Italy. [davide.fiore@unina.it](mailto:davide.fiore@unina.it)

<sup>2</sup>Fabio Della Rossa is with the Department of Electronics, Information, and Bioengineering, Politecnico of Milan, 20133 Milan, Italy. [fabio.dellarossa@polimi.it](mailto:fabio.dellarossa@polimi.it)

<sup>3</sup>Agostino Guarino is with the Department of Electrical Engineering and Information Technology, University of Naples Federico II, Via Claudio 21, 80125 Naples, Italy. [agostino.guarino@unina.it](mailto:agostino.guarino@unina.it)

<sup>4</sup>Mario di Bernardo is with Department of Electrical Engineering and Information Technology, University of Naples Federico II, Via Claudio 21, 80125 Naples, Italy. [mario.dibernardo@unina.it](mailto:mario.dibernardo@unina.it)

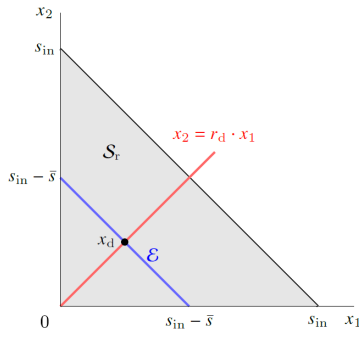

Fig. 1. Graphical representation of the domain of definition  $S_r$  (gray region) of the reduced system (2) and position of the control set-point  $x_d$ . The set-point  $x_d$  is the point of intersection between the equilibrium set  $\mathcal{E}$  defined in (6) (blue line) and the line designing the desired ratio  $r_d$  defined in (8) (red line).

After some manipulations [7], the chemostat model with two species, can be expressed as

$$\begin{cases} \dot{x}_1 = (\mu_1(s) - D(t)) x_1 \\ \dot{x}_2 = (\mu_2(s) - D(t)) x_2 \\ \dot{s} = -\frac{1}{Y_1} \mu_1(s) x_1 - \frac{1}{Y_2} \mu_2(s) x_2 + D(t)(s_{in} - s) \end{cases} \quad (1)$$

where the variables  $x_1, x_2 \in \mathbb{R}_{\geq 0}$  denote the concentrations of biomass of the species 1 and 2, respectively, and  $s \in [0, s_{in}]$  denotes the concentration of the substrate in the chemostat. Moreover,  $\mu_i(s)$  is the growth rate of the  $i$ -th species,  $s_{in}$  is the concentration of substrate in the inlet flow, assumed to be constant, and  $Y_i$  is the yield coefficient, assumed without loss of generality to be unitary for both species. The control input  $D(t) : \mathbb{R}_{\geq 0} \mapsto [D_{min}, D_{max}]$ , with  $D_{min} > 0$ , is the dilution rate, defined as the ratio between the inlet flow rate and the culture volume in the chemostat. The removal rate is assumed to be the same for both species, that is, the culture is well-mixed and mortality and attachment of the bacteria are neglected [7].

Under the assumption that the control input  $D(t)$  is persistently exciting [9], i.e., such that  $\int_0^{+\infty} D(\tau) d\tau = +\infty$ , it follows that the subspace  $\mathcal{S} := \{(x_1, x_2, s) : x_1 + x_2 + s = s_{in}\}$  is attractive and invariant for all solutions of system (1). Therefore, provided that  $D(t) > 0$  for all  $t > 0$  and that the initial condition of system (1) belongs to  $\mathcal{S}$ , the dynamics of (1) on  $\mathcal{S}$  can be described by considering the *reduced system*

$$\begin{cases} \dot{x}_1 = (\mu_1(s) - D(t)) x_1 \\ \dot{x}_2 = (\mu_2(s) - D(t)) x_2 \end{cases} \quad (2)$$

defined on the invariant set  $\mathcal{S}_r := \{(x_1, x_2) \in \mathbb{R}_{\geq 0}^2 : x_1 + x_2 \leq s_{in}\}$  (Fig. 1).

### A. Growth dynamics

A fundamental role in the dynamics of model (1) is played by the growth rate functions  $\mu_i(\cdot) : [0, s_{in}] \mapsto \mathbb{R}_{\geq 0}$ , which are generally assumed to be  $C^1$ , strictly increasing and such that  $\mu_i(0) = 0$ , for  $i = 1, 2$ . We consider the case in which  $\mu_1$  and  $\mu_2$  intersect at most two points, namely at  $s = 0$  and  $s = \bar{s}$ , that is the case of strictly concave growth rate functions. When they intersect only at  $s = 0$ , it follows

that one species grows always faster than the other, that is,  $\mu_i(s) > \mu_j(s)$ ,  $i \neq j$ , for all  $s > 0$  and for any value of  $D$ . From the Competitive Exclusion Principle (CEP) [10], [11], this implies that no control input  $D(t)$  exists such that more than one strain survives at steady state. Specifically, any positive solution of (1) converges to the equilibrium point such that  $s = \lambda_i(D)$ ,  $x_i = s_{in} - \lambda_i(D)$  and  $x_j = 0$ , where  $\lambda_i(D) := \sup\{s \in [0, s_{in}] : \mu_i(s) < D\}$ ,  $i = 1, 2$ , is the so-called break-even concentration.

On the other hand, if the growth functions also intersect at  $s = \bar{s}$ , it is possible for the two species to coexist. This corresponds to a scenario in which the two species are complementary, that is, one species grows faster than the other for low values of  $s$ , while the situation is reversed for high values of  $s$ . In what follows we will consider this latter scenario obtained by making the following assumption [7].

*Assumption 1:* There exists  $\bar{s} \in (0, s_{in})$  such that

$$(\mu_1(s) - \mu_2(s))(s - \bar{s}) > 0, \quad s \in [0, s_{in}], \quad s \neq \bar{s}. \quad (3)$$

Moreover, we denote with  $\bar{D} := \mu_1(\bar{s}) = \mu_2(\bar{s})$  the corresponding value of the dilution rate.

In the rest of this letter we consider growth functions of Monod's type [12], that is, we assume

$$\mu_i(s) := \frac{\mu_i^* s}{k_i + s}, \quad i = 1, 2, \quad (4)$$

where  $\mu_i^*$  and  $k_i$  are positive constants.

### B. Open-loop dynamics and bifurcation analysis

Before presenting the control problem and the solutions we propose in the next sections, we analyze here the rich nonlinear dynamics of the open-loop system (2). Namely, we show the steady state behavior of system (2) and how it changes as the dilution rate  $D$  is being varied.

The equilibrium points of system (2) can be obtained as the intersections between the four nullclines of its vector field in the domain  $\mathcal{S}_r$ . Specifically, each equation  $\dot{x}_i = 0$ ,  $i = 1, 2$ , has two solutions, namely  $x_i = 0$ , that is, the  $x_j$ -axis,  $i \neq j$ , and

$$x_2 = -x_1 + s_{in} - s_i, \quad s_i = \frac{k_i D}{\mu_i^* - D}, \quad (5)$$

where the last equation follows from  $\mu_i$  being of Monod's type (4). Therefore, the origin  $(0, 0)$  is always an equilibrium point for the system; its stability depending on  $D$ . Moreover, the system might admit other steady states whose number and stability depend on the values of  $D$  and on the growth functions  $\mu_i$ . Specifically, we can identify the following six cases corresponding to different positions of the two nullclines (5) in  $\mathcal{S}_r$  (Figure 2):

- (I)  $D = 0$ : when  $s_1 = s_2 = 0$  the nullclines (5) overlap and all solutions asymptotically converge to the stable equilibrium set  $\mathcal{E}_0 := \{(x_1, x_2) \in \mathcal{S}_r : x_1 + x_2 = s_{in}\}$ , while the origin is locally unstable. This case corresponds to an undesired working condition in which no new substrate is added to the reactor and the biomass is in starvation. However, this situation can never occur

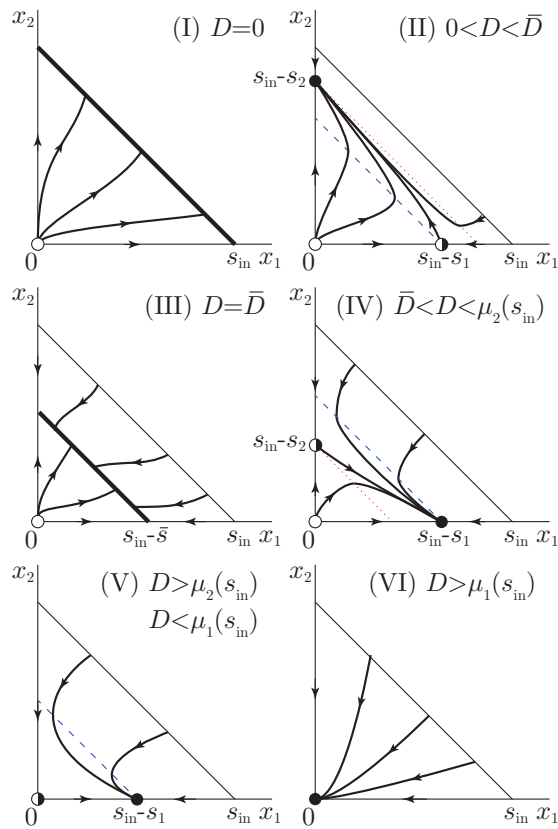

Fig. 2. Possible state portraits of system (2) for different values of constant dilution rate  $D$ . Blue dashed and red dotted lines correspond to the two nullclines of the system reported in (5) for  $i = 1$  and  $i = 2$ , respectively. Full, empty, and half-filled dots represent stable, unstable and saddle equilibria, respectively.

in continuous culture as it is always assumed that  $D(t) > 0, \forall t > 0$ .

- (II)  $0 < D < \bar{D}$ : there are two equilibrium points, each one on an axis, corresponding to their intersection with the nullclines (5). Specifically,  $x_2^* := (0, s_{in} - s_2)$  is a stable node and  $x_1^* := (s_{in} - s_1, 0)$  is a saddle, where  $s_i$  is as in (5), while the origin is locally unstable. This case corresponds to a low concentration of the substrate at steady state due to its consumption and low dilution rate. This results in species 2 prevailing over species 1.
- (III)  $D = \bar{D}$ : the nullclines (5) again overlap and all solutions asymptotically converge to the stable equilibrium set

$$\mathcal{E} := \{(x_1, x_2) \in \mathcal{S}_r : x_1 + x_2 = s_{in} - \bar{s}\}, \quad (6)$$

while the origin is locally unstable. These equilibrium points correspond to a condition of stable coexistence between the two species.

- (IV)  $\bar{D} < D < \mu_2(s_{in})$ : this case is similar to case (II) but with opposite stability properties of the equilibrium points, that is,  $x_1^*$  is a stable node and  $x_2^*$  is a saddle, while the origin is still locally unstable. In this case species 1 prevails at steady state because of the high concentration of substrate.

- (V)  $\mu_2(s_{in}) < D < \mu_1(s_{in})$ : there is only one intersection in the domain  $\mathcal{S}_r$  between the nullclines (5) and the axes at the point  $x_1^*$ , which is stable, while in this case the origin is a saddle. At steady state species 2 is flushed-out from the chemostat due to the dilution rate  $D$  being greater than its maximum growth rate  $\mu_2(s_{in})$ .
- (VI)  $\mu_1(s_{in}) < D < D_{max}$ : there is a unique stable equilibrium point in the origin to which all solutions converge. In this case,  $D$  being greater than the maximum value of both growth rates causes the flush-out of both species, that is, the cells are removed from the chemostat faster than they can grow.

The transitions between the dynamical behaviors described above are due to bifurcations of the equilibrium points of the system. In particular, in cases (I) and (III) the system undergoes a *degenerate transcritical bifurcation* [13], in which the equilibrium sets  $\mathcal{E}_0$  and  $\mathcal{E}$  appear, respectively, as the two nullclines (5) overlap. These two sets are not structurally stable, since they suddenly disappear for any small perturbation of the bifurcation parameter  $D$  from the bifurcation points  $D = 0$  and  $D = \bar{D}$ . On the other hand, for  $D = \mu_2(s_{in})$  ( $D = \mu_1(s_{in})$ ) the equilibrium points undergo a regular transcritical bifurcation, in which the equilibrium point  $x_2^*$  ( $x_1^*$ ) collides with the one in the origin, exchanges stability and exits the domain  $\mathcal{S}_r$ .

### III. CONTROL PROBLEM FORMULATION

Under Assumption 1 it follows that, by applying a constant, open-loop control input  $D = \bar{D}$  to system (2), coexistence of the two species can be achieved at steady state. Specifically, any solution of (2) converges to the equilibrium set  $\mathcal{E}$  defined in (6), and more precisely to a point whose position depends on the initial condition  $x_0 = (x_{0,1}, x_{0,2})$ . Therefore, it is not possible by means of any open-loop control input to guarantee at the same time coexistence of both species while regulating the *ratio* between the steady-state concentrations  $x_1$  and  $x_2$  to some reference value. Moreover, structural instability of the equilibrium set  $\mathcal{E}$ , uncertainties on the parameters of the growth functions  $\mu_i(s)$  and other disturbances cannot be rejected by means of any open-loop control law. It is therefore necessary to regulate the dilution rate of the chemostat by employing closed-loop control laws. More formally, we want to solve the following control problem.

*Problem statement:* Design some feedback control input  $D(x_1, x_2)$  for system (2) such that:

- 1) *coexistence* of the two species is guaranteed for all time, that is,

$$x_i(t) > x_{i,\min}, \quad \forall t > 0, \quad i = 1, 2, \quad (7)$$

where  $x_{i,\min} > 0$  is some safety threshold to avoid extinction of species  $i$  due to unwanted events, such as flush-out or starvation;

- 2) the *ratio*  $x_2/x_1$  between the concentrations of the two species is robustly regulated at steady state to a desired value  $r_d > 0$ , that is,

$$x_2(t) = r_d \cdot x_1(t), \quad \text{as } t \rightarrow +\infty. \quad (8)$$

Notice that the previous control problem correspond to requiring that all solutions of system (2) are stabilized to the point of intersection between the equilibrium set  $\mathcal{E}$  in (6), where coexistence is possible, and the line defined by (8) (see Fig. 1), that is, to the point

$$x_d := \left( \frac{s_{in} - \bar{s}}{1 + r_d}, r_d \frac{s_{in} - \bar{s}}{1 + r_d} \right). \quad (9)$$

We further assume that the concentrations  $x_1$  and  $x_2$  are either directly or indirectly measurable, for example by means of fluorescent reporter proteins produced by one or both species.

#### IV. PROPOSED CONTROLLERS

In this section we present and analyze two feedback control strategies that solve the control problem presented in Section III. Namely, a proportional gain-scheduled state-feedback and a switching controller. After presenting the control laws, we validate and compare their robustness and performance by means of numerical simulations.

In all simulations we use the following values of the parameters of the growth functions  $\mu_i(s)$  [7]:  $\mu_1^* = 0.5$ ,  $k_1 = 5$ ,  $\mu_2^* = 0.16$ ,  $k_2 = 0.13$ . Furthermore, we set  $s_{in} = 5$ ,  $D_{min} = 0.1$ ,  $D_{max} = 1$ . These limiting values of the dilution rate  $D$  guarantee, respectively, a continuous flow rate of culture medium and that fresh medium equal to the volume of the culture is added in the bioreactor at most in one hour.

##### A. State-feedback control

The first controller we propose is a state-feedback controller whose control gains continuously depend on the desired ratio  $r_d$ . This to guarantee, locally to the set-point  $x_d$ , the same closed-loop dynamics for any  $r_d$ . Specifically, the control input is defined as

$$D(x) = \bar{D} + K(r_d) \cdot (x_d - x), \quad (10)$$

saturated when exiting the interval  $[D_{min}, D_{max}]$ , with  $K(r_d) = (K_1(r_d), K_2(r_d))$  being the control gain vector. The control input (10) is composed by two terms: (i) a feedforward action  $\bar{D}$ , that guarantees convergence to the equilibrium set  $\mathcal{E}$  of coexistence between the two species, and (ii) a feedback action  $K(r_d) \cdot (x_d - x)$  that steers the state  $x$  towards the desired set-point  $x_d \in \mathcal{E}$  and rejects disturbances due to uncertainties on the system parameters.

By pole placement design, the control gain vector  $K(r_d)$  is evaluated by assigning the desired eigenvalues  $(\lambda_1, \lambda_2)$  to the Jacobian matrix, evaluated at  $x = x_d$ , of the closed-loop system. The expressions of the control gains have the form

$$K_1(r_d) = a_1 + b_1 r_d + \frac{c}{1 + r_d}, \quad (11)$$

$$K_2(r_d) = a_2 + b_2 \frac{1}{r_d} + \frac{c}{1 + r_d}, \quad (12)$$

where  $a_1, a_2, b_1, b_2, c$  are coefficients that depend on  $(\lambda_1, \lambda_2)$  whose expressions are not reported for the sake of brevity. By numerical analysis the closed-loop dynamics has been found to have four equilibrium points: a stable node in  $x_d$ , an unstable node in the origin, and two saddle, each on

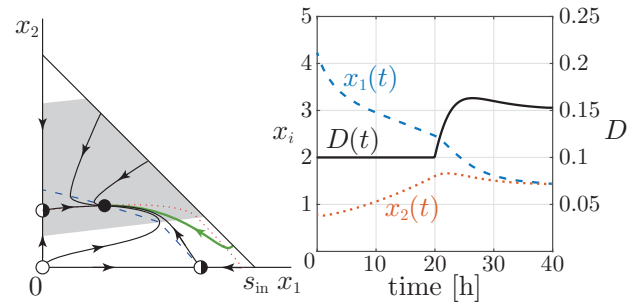

Fig. 3. State-feedback controller. Left panel: State portrait of the closed-loop system (2)–(10). Blue dashed and red dotted lines correspond to the two nullclines. Full, empty, and half-filled dots represent stable, unstable and saddle equilibria, respectively. The gray area of the plane represent the  $(x_1, x_2)$  values in which the control input is not saturated. Right panel: time evolution of the state and of the control input of the thick green trajectory reported in the left panel. For the closed loop system,  $\lambda_1 = \lambda_2 = -0.2$ ,  $r_d = 1$ ,  $x_d = (1.42, 1.42)$ ,  $K_1 = 0.11$ , and  $K_2 = -0.34$ .

one axis (Fig. 3, left panel). Therefore, under the action of the feedback control input (10), all solutions converge to  $x_d$  for any initial condition  $x_0 \in \mathcal{S}_r$ .

A representative simulation of the closed-loop system is reported in Fig. 3. The control strategy is able to regulate the two concentrations to the desired ratio  $r_d = 1$ , as required; the state of the system converging to the point  $x_d$  lying on  $\mathcal{E}$ . Notice that the response of the closed-loop system is largely affected by the intrinsic growth rate of the biomass in the chamber which, of course, cannot be sped up by the control input.

##### B. Switching control

The second controller we consider is a switching controller that changes the control input  $D$  between two constant values,  $d^+$  and  $d^-$ , depending on the sign of a scalar function  $\sigma(x)$ , that is,

$$D(x) = \begin{cases} d^+, & \text{if } \sigma(x) > 0 \\ d^-, & \text{if } \sigma(x) < 0 \end{cases}, \quad (13)$$

where

$$\sigma(x) := x_2 - \alpha x_1 - \gamma. \quad (14)$$

The switching surface  $\Sigma$  is defined as the zero-set of  $\sigma(x)$ , i.e.,  $\Sigma := \{x \in \mathcal{S}_r : \sigma(x) = 0\}$ . The control parameters are chosen such that (i) there exists a sliding region  $\hat{\Sigma} \subseteq \Sigma$  towards which all solutions converge, and (ii)  $x_d$  is a stable pseudo-equilibrium point for the sliding vector field  $f_s(x)$ .

We first analyze (i). Denoting with  $f^+(x)$  and  $f^-(x)$  the closed-loop vector fields when  $D = d^+$  and  $D = d^-$ , respectively, and with  $f_N^\pm = \nabla \sigma \cdot f^\pm$  their normal component to  $\Sigma$ , a sliding region exists if  $f_N^+(x) < 0 \wedge f_N^-(x) > 0$  for some  $x \in \Sigma$ . After some algebra, we obtain the condition

$$\gamma d^- < d_s(x) < \gamma d^+, \quad (15)$$

where  $d_s(x) := -\alpha \mu_1(s)x_1 + \mu_2(s)x_2$ .

Also, using Filippov's convention [14, p.52] the sliding vector field can be defined as

$$f_s(x) := \begin{bmatrix} (\mu_1(s) - d_s(x)/\gamma)x_1 \\ (\mu_2(s) - d_s(x)/\gamma)x_2 \end{bmatrix}, \quad (16)$$

and it has four equilibrium points, namely  $(0, 0)$ ,  $(0, \gamma)$ ,  $(-\gamma/\alpha, 0)$ , and a last one for  $d_s(x)/\gamma = \mu_1(s) = \mu_2(s) = \bar{D}$  at the point of intersection between  $\Sigma$  and  $\mathcal{E}$ . Therefore, using (15) we have that a necessary condition for  $x_d$  to be a pseudo-equilibrium point of  $f_s$  is that

$$\gamma d^- < \gamma \bar{D} < \gamma d^+. \quad (17)$$

Thus, the desired point is a pseudo-equilibrium of the sliding dynamics only if  $\gamma > 0$ .

Note that, since the sliding vector field vanishes only on  $\mathcal{E}$ , setting a desired ratio  $r_d$  between the two species links the parameters  $\alpha$  and  $\gamma$  defining the sliding region as follow

$$\alpha = r_d - \gamma/x_{d,1}. \quad (18)$$

where  $x_d$  is defined in (9).

To prove (ii) we can analyze the local stability of the equilibrium points in  $(0, 0)$  and  $(0, \gamma)$  of the sliding vector field  $f_s(x)$  by studying the sign of its components locally to the points. It can be proved that the origin is always unstable since  $f_{s,1}(x_1, 0)$  and  $f_{s,2}(0, x_2)$  are both positive close to the origin. Moreover, we have that  $f_{s,2}(0, x_2) > 0$  for  $0 < x_2 < \gamma$  and  $f_{s,2}(0, x_2) < 0$  for  $x_2 > \gamma$ , therefore solutions on the  $x_2$ -axis converge to  $(0, \gamma)$ . On the other hand, in the transversal direction we have that

$$f_{s,1}(x_1, \gamma) = \mu_1(s) \left( 1 - \frac{\mu_2(s)}{\mu_1(s)} + \frac{\alpha}{\gamma} x_1 \right) x_1, \quad (19)$$

whose changing of sign depends on  $\gamma$  being greater or less than  $s_{in} - \bar{s}$ , since the term  $1 - \mu_2(s)/\mu_1(s)$  in (19) is positive only when the state  $x$  is below  $\mathcal{E}$ , that is, when  $x_1 + x_2 < s_{in} - \bar{s}$ . Therefore, it can be proved that when  $\gamma > s_{in} - \bar{s}$  the point  $(0, \gamma)$  is a stable node, while when  $\gamma < s_{in} - \bar{s}$  it is a saddle.

It follows that the equilibrium point of interest, located at the intersection between  $\Sigma$  and  $\mathcal{E}$ , is stable if

$$0 < \gamma < s_{in} - \bar{s}. \quad (20)$$

At the boundary of this region in parameter space two different bifurcations occur. When  $\gamma = s_{in} - \bar{s}$  the stability of the desired point is lost due to a degenerate transcritical bifurcation similar to the one described in the previous section. As  $\gamma$  decreases, each of the two vector fields generates a *fold bifurcation of tangent points* [13] of the Filippov vector field, which gives rise to crossing regions in the switching surface at the right and at the left of the pseudo-equilibrium, respectively (see the crossing region at the left of the pseudo-equilibrium in the lower-left panel of Fig. 4), causing the boundaries of the sliding region  $\hat{\Sigma}$  to shrink, until  $\hat{\Sigma}$  disappears for  $\gamma = 0$  at an *invisible-invisible pseudo-Hopf bifurcation* [13]. Note that if  $\gamma = 0$  the bifurcating pseudo-equilibrium is stable, and is reached via converging crossings of the switching manifold, at a rate less than exponential. However, for  $\gamma$  in (20) there always exists an attractive sliding region in the neighborhood of the pseudo-node at  $x_d$ , to which all solutions in  $S_r$  converge.

Two representative simulations of the closed-loop system are reported in Fig. 4, for choices of  $\gamma > x_{d,2}$  (top panels)

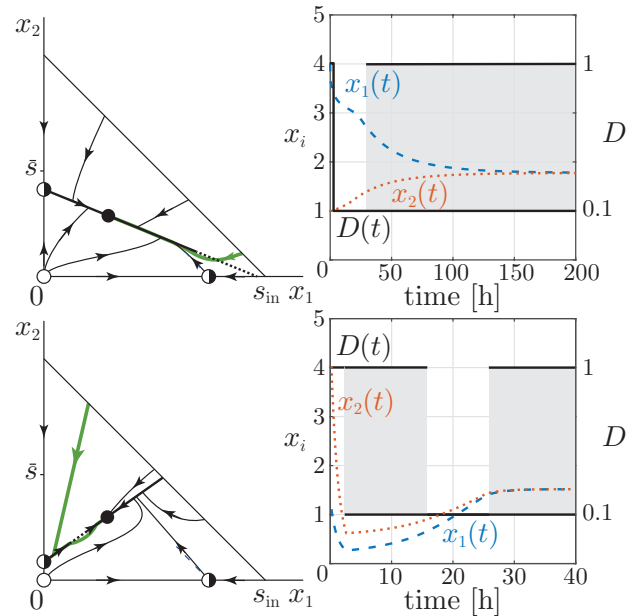

Fig. 4. Switching controller. Left panels: State portraits of the closed-loop system (2), (13) and (14). The switching surface  $\Sigma$  is the thick line, full when sliding conditions (15) are satisfied, dotted otherwise (crossing region). Full, empty, and half-filled dots represent stable, unstable and saddle equilibria or pseudo-equilibria, respectively. In the top panel  $\gamma = 2$ , in the bottom panel  $\gamma = 0.4$ . Right panels: time evolution of the state and of the control input of the thick green trajectories reported in the respective left panel. In the shaded regions, the control switches at high frequency between the two values. Other parameter values:  $r_d = 1$ ,  $x_d = (1.42, 1.42)$ ,  $d^+ = D_{max}$ ,  $d^- = D_{min}$ .

and  $\gamma < x_{d,2}$  (bottom panels). In both cases there exists a unique stable pseudo-equilibrium point, on the sliding region  $\hat{\Sigma}$  at its intersection with the equilibrium set  $\mathcal{E}$ . Notice that in the case  $\gamma > x_{d,2}$  the convergence of sliding solutions to the pseudo-equilibrium is slower than in the other case. This is essentially due to  $f^+(x)$  and  $f^-(x)$  pointing almost in the same direction in the neighborhood of  $\hat{\Sigma}$ , and does not depend significantly on the particular choice of  $d^+$  and  $d^-$  being made.

For this reason and to guarantee greater robustness to disturbances, as we are going to show next, the control parameter  $\gamma$  is chosen in the range

$$0 < \gamma < x_{d,2}. \quad (21)$$

In conclusion, to stabilize all solutions on the set-point  $x_d$ , it suffices to choose the control parameters in (13)-(14) so as to satisfy conditions (17), (18) and (21).

### C. Robustness and performance analysis

Here we first analyze the robustness of the proposed controllers to variations of the parameters of the growth functions  $\mu_i(s)$ ,  $i = 1, 2$ , and later we compare their performance in terms of average settling time.

The growth functions are in general uncertain and not exactly known, since they are typically identified from experimental data. Perturbations on the values of the parameters  $\mu_i^*$  and  $k_i$ , can cause the growth functions to intersect each other at a value, say  $\tilde{s}$ , different from the nominal value

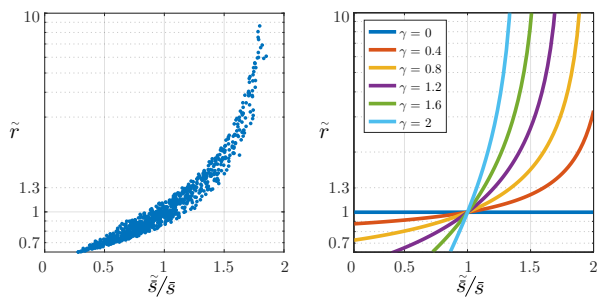

Fig. 5. Left panel: Robustness analysis of the state-feedback controller. For each sample  $(\tilde{\mu}_1^*, k_1, \tilde{\mu}_2^*, k_2)$  in the parameter space, the substrate concentration at coexistence  $\tilde{s}$  and the steady-state ratio  $\tilde{r}$  in perturbed conditions were evaluated at closed-loop. A total of 1000 samples were extracted using orthogonal sampling. Right panel: Robustness analysis of the switching controller. The graph of the function (22) is reported for different values of the control parameter  $\gamma$ . The control parameters of the algorithms were set as in Figs. 3-4, with desired ratio  $r_d = 1$ .

$\bar{s}$ . This in turn results in a change of the position of the equilibrium set  $\mathcal{E}$  defined in (6) from its nominal position to a new position  $\tilde{\mathcal{E}}(\tilde{s})$  (note that the set-point  $x_d$  in (9) used by the algorithm depends on  $\bar{s}$ ). Hence, the solutions of the closed-loop system will converge to some other point  $\tilde{x}$  to which it corresponds a different ratio at steady state between the species  $\tilde{r} \neq r_d$ . Therefore, we can analyze the robustness of the controllers by evaluating the relationship between the steady-state ratio  $\tilde{r}$  and the perturbed  $\tilde{s}$ .

To analyze the robustness of the state-feedback controller (10) we sampled the parameter space  $(\mu_1^*, k_1, \mu_2^*, k_2)$  with the orthogonal sampling method [15] by varying each parameter by  $\pm 30\%$  from its nominal value and taking 1000 samples. For each sample  $(\tilde{\mu}_1^*, \tilde{k}_1, \tilde{\mu}_2^*, \tilde{k}_2)$  we evaluated the corresponding  $\tilde{s}$  and the ratio  $\tilde{r}$  to which the closed-loop system converge. The result of this numerical analysis is reported in Fig. 5, left panel. We can notice that perturbations in the parameters that cause an error on  $\tilde{s}/\bar{s}$  at most of 50% result in a regulation error  $|\tilde{r} - r_d|$  smaller than 30%.

For what concerns the switching controller, under perturbation of the parameters, the control algorithm is such made that it still guarantees convergence to the point of intersection between  $\Sigma$  and the perturbed equilibrium set  $\tilde{\mathcal{E}}(\tilde{s})$ . This point can be analytically computed to explicitly obtain the following relationship between  $\tilde{r}$  and  $\tilde{s}$ , that is,

$$\tilde{r}(\tilde{s}) = \frac{-\gamma - \alpha s_{in} + \alpha \tilde{s}}{\gamma - s_{in} + \tilde{s}}. \quad (22)$$

The graph of the function  $\tilde{r}(\tilde{s})$  is reported in Fig. 5, right panel, for different values of the control parameter  $\gamma$ . As the control parameter  $\gamma$  decreases, the closed-loop response is more robust to perturbations of the growth functions. Moreover, it can be noticed that for  $\gamma \leq 0.8$  the switching controller already exhibits higher robustness than the state-feedback controller.

The performance of the control algorithms have been compared by numerically evaluating the average settling time  $\langle T \rangle$  of their closed-loop response as their control parameters change. As the settling time strongly depends

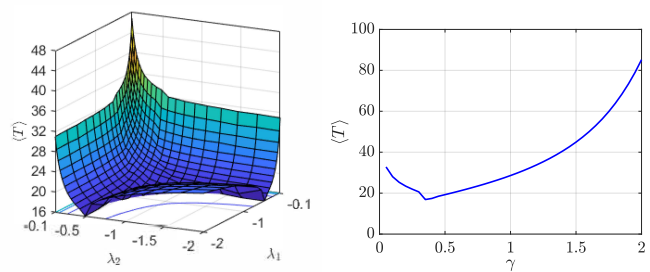

Fig. 6. Average settling time  $\langle T \rangle$  as function of the tuning parameters of the state-feedback control (left panel) and switching control (right panel) strategies.

on the initial condition we choose, for each value of the control parameters,  $\langle T \rangle$  was computed by uniformly sampling the domain  $\mathcal{S}_r$ , evaluating the settling time taking each point as initial condition and then averaging the results over all initial conditions. For the state-feedback controller, we evaluated  $\langle T \rangle$  as the desired closed-loop eigenvalues  $(\lambda_1, \lambda_2)$  are varied over  $[-2, 0] \times [-2, 0]$ . The results are reported in Fig. 6, left panel, showing a minimum value of about 16 h. Smaller values of the eigenvalues resulted in strongly saturated control inputs and therefore they were not considered. Analogously, the average settling time  $\langle T \rangle$  for the switching controller was evaluated as the control parameter  $\gamma$  was varied in the interval  $[0.05, 2]$ . The results are reported in Fig. 6, right panel, showing a minimum value of about 16.87 h at  $\gamma \approx 0.35$ .

## V. CONCLUSIONS

We presented the analysis and control of the concentrations of two cellular populations growing in continuous culture in a single chemostat. By exploiting the nonlinear dynamics of the open-loop system we constructed two alternative control strategies, a gain-scheduling state feedback controller and a sliding controller. We showed that both are effective in solving the problem while guaranteeing robustness to uncertainties and parameter variations. A pressing problem is that when such strategies are adopted, while the desired reference ratio between the two populations can be achieved, little or no control of the transient dynamics can be controlled; the settling time being limited by the populations own dynamics. Also, sliding controllers are not easy to implement in this context and appropriate solutions will have to be explored to make the switching frequency compatible with the physical constraints on the control input  $D(t)$ . To solve these problems, ongoing work is aimed at modeling and controlling multi-chamber chemostat design. For example, in a three chamber setting, each population could be grown in a separate vessel and a multi-input control strategy could be devised to control their ratio in the third chamber where they are mixed together.

## ACKNOWLEDGMENT

This work has received funding from the European Commission under the H2020 - FET Open ‘‘Control Engineering of Biological Systems for Reliable Synthetic Biology Applications (COSY-BIO)’’ grant.

## REFERENCES

- [1] P. Bittihn *et al.*, “Rational engineering of synthetic microbial systems: from single cells to consortia,” *Current Opinion in Microbiology*, vol. 45, pp. 92–99, 2018.
- [2] G. Fiore *et al.*, “In-silico analysis and implementation of a multicellular feedback control strategy in a synthetic bacterial consortium,” *ACS Synthetic Biology*, vol. 6, no. 3, pp. 507–517, 2016.
- [3] M. Mauri *et al.*, “Enhanced production of heterologous proteins by a synthetic microbial community: Conditions and trade-offs,” *PLoS Computational Biology*, vol. 16, no. 4, p. e1007795, 2020.
- [4] M. Sadeghpour and othres, “Bistability and oscillations in co-repressive synthetic microbial consortia,” *Quantitative Biology*, vol. 5, no. 1, pp. 55–66, 2017.
- [5] D. Salzano *et al.*, “Ratiometric control for differentiation of cell populations endowed with synthetic toggle switches,” in *Proc. of the 58th IEEE Conference on Decision and Control*, 2019, pp. 927–932.
- [6] P. De Leenheer and H. Smith, “Feedback control for chemostat models,” *Journal of Mathematical Biology*, vol. 46, no. 1, pp. 48–70, 2003.
- [7] F.-Z. Tani, A. Rapaport, and T. Bayen, “A hybrid control against species invasion in the chemostat,” in *Proc. of the IEEE Conference on Decision and Control*, 2019.
- [8] S.-B. Hsu *et al.*, “A mathematical theory for single-nutrient competition in continuous cultures of micro-organisms,” *SIAM Journal on Applied Mathematics*, vol. 32, no. 2, pp. 366–383, 1977.
- [9] G. Bastin and D. Dochain, *On-line estimation and adaptive control of bioreactors*. Elsevier, 1990.
- [10] R. A. Armstrong and R. McGehee, “Competitive exclusion,” *The American Naturalist*, vol. 115, no. 2, pp. 151–170, 1980.
- [11] H. L. Smith and P. Waltman, *The theory of the chemostat: dynamics of microbial competition*. Cambridge university press, 1995.
- [12] J. Monod, “The growth of bacterial cultures,” *Annual Review of Microbiology*, vol. 3, no. 1, pp. 371–394, 1949.
- [13] Y. A. Kuznetsov *et al.*, “One-parameter bifurcations in planar Filippov systems,” *International Journal of Bifurcation and chaos*, vol. 13, no. 08, pp. 2157–2188, 2003.
- [14] A. F. Filippov and F. M. Arscott, *Differential equations with discontinuous righthand sides*. Springer, 1988.
- [15] M. D. McKay *et al.*, “A comparison of three methods for selecting values of input variables in the analysis of output from a computer code,” *Technometrics*, vol. 42, no. 1, pp. 55–61, 2000.
